# Supplementary material for: A stress-induced cilium-to-PML-NB route drives senescence initiation
Source: PubMed Central journal article supplement (PMC10076330; doi:10.1038/s41467-023-37362-7), 2023-04-03
Supplement: 41467_2023_37362_MOESM1_ESM.pdf [file 41467_2023_37362_MOESM1_ESM.pdf]

# Supplementary Materials for

## **A stress-induced cilium-to-PML-NB route drives senescence initiation**

Xiaoyu Ma *et al.*

Correspondence to: [hu.jinghua@mayo.edu](mailto:hu.jinghua@mayo.edu)

### **This PDF file includes:**

Figs. S1 to S11

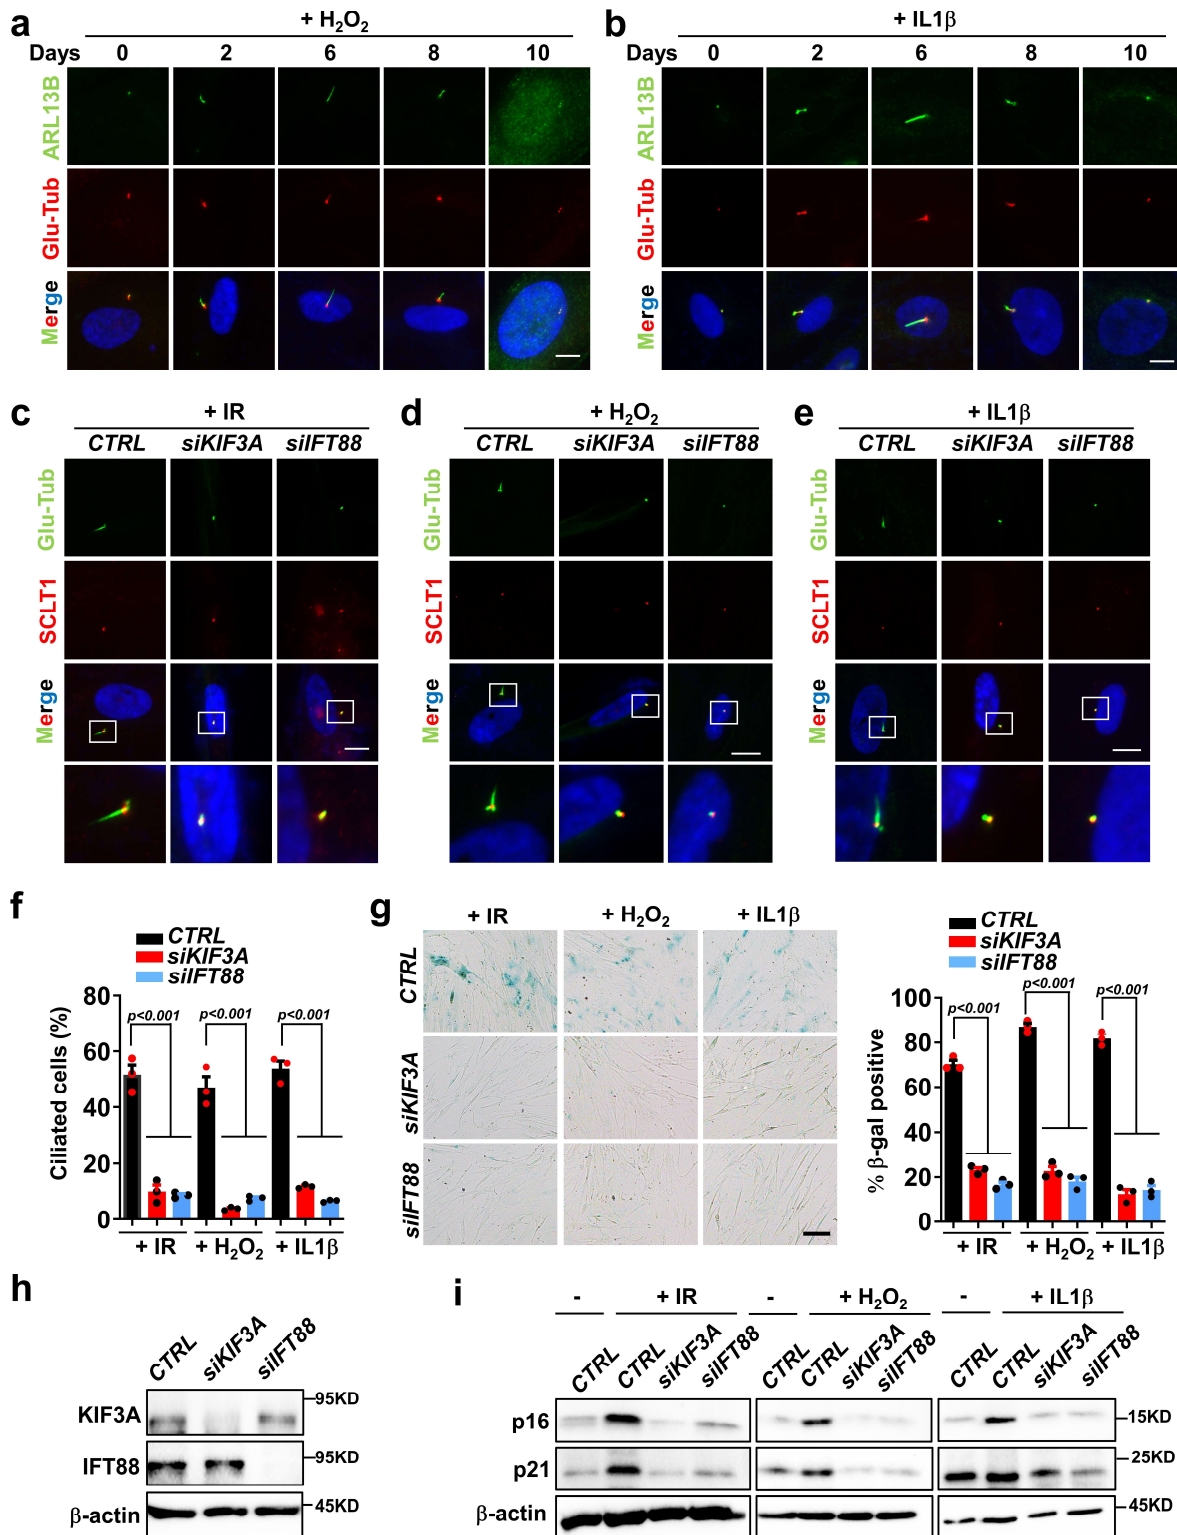

Supplementary Fig. 1. Transient ciliogenesis is required for senescence initiation.

**a**, Immunofluorescent staining of primary cilia in IMR-90 cells during H<sub>2</sub>O<sub>2</sub>-induced senescence. Primary cilia were labeled with antibodies against Glutamylated-tubulin (red) and ARL13B (green). Three experiments were repeated independently with similar results. **b**, Immunofluorescent staining of primary cilia in IMR-90 cells during IL1 $\beta$ -induced senescence. Cilia were labeled with antibodies against Glutamylated-tubulin and ARL13B. Three experiments were repeated independently with similar results. **c-f**, Immunofluorescent staining of primary cilia in *KIF3A* or *IFT88*-knockdown IMR-90 cells at day 2 post-irradiation (**c**), or H<sub>2</sub>O<sub>2</sub> exposure (**d**), or IL1 $\beta$  exposure (**e**). Cilia were labeled with antibody against Glutamylated-tubulin and cilia base were labeled with antibody against SCLT1. The percentage of ciliated cells were quantified ( $n = 100$ ) (**f**). **g-i**, SA- $\beta$ -gal staining ( $n > 100$  cells per experiment) (**g**) and western blot of *KIF3A* or *IFT88* (**h**) and senescence markers (**i**) in *KIF3A* or *IFT88*-knockdown IMR-90 cells at day 10 post-irradiation or at day 5 post-treatment with H<sub>2</sub>O<sub>2</sub> or IL1 $\beta$ . Scale bar, 10  $\mu$ m. Results from 3 independent experiments were statistically analyzed and plotted as means  $\pm$  SEM. Two-way ANOVA followed by Bonferroni multiple-comparison analysis was used for **f** and **g**. Source data are provided as a Source Data file.

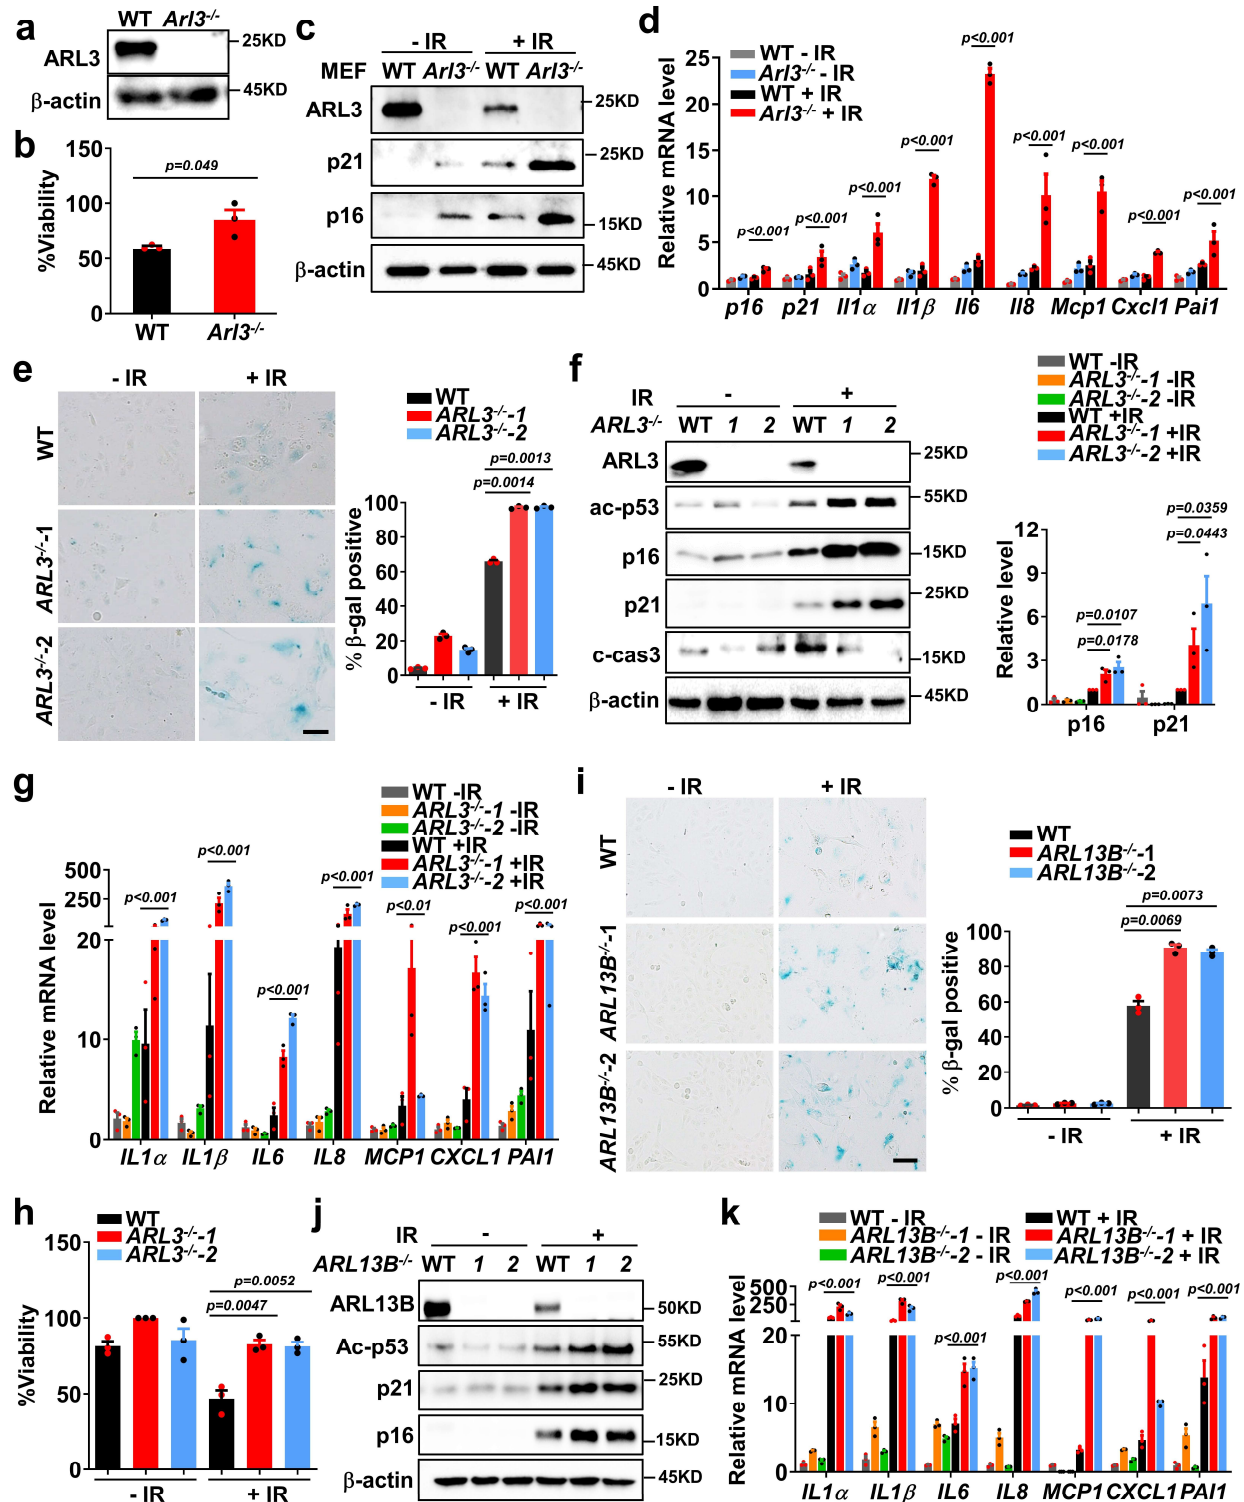

Supplementary Fig. 2. ARL3 or ARL13B deficiency promotes IR-induced senescence. **a**, Western blot of ARL3 in WT, *Arl3*<sup>-/-</sup> MEF cells. **b**, Viability assay of WT or *Arl3*<sup>-/-</sup> MEF cells with

IR exposure. **c, d**, Western blot of senescence markers (**c**) and relative mRNA levels of SASP genes (**d**) in WT or *Ar13*<sup>-/-</sup> MEF cells without or with IR exposure at day 7 post-irradiation. **e-g**, SA- $\beta$ -gal staining (n>100 cells per experiment) (**e**), western blot of senescence markers (**f**) and relative mRNA levels of SASP genes (**g**) in WT or *ARL3*<sup>-/-</sup> RCTE cells at day 7 post-irradiation. **h**, Viability assay of WT or *ARL3*<sup>-/-</sup> RCTE cells without or with IR exposure at day 7 post-irradiation. **i-k**, SA- $\beta$ -gal staining (n>100 cells per experiment) (**i**), western blot of senescence markers (**j**) and relative mRNA levels of SASP markers (**k**) in WT or *ARL13B*<sup>-/-</sup> RCTE cells at day 7 after irradiation. Scale bar, 200  $\mu$ m. Results (**b, d-h, k-h**) from n=3 independent experiments were statistically analyzed and plotted as means  $\pm$  SEM. Two-tailed Student's unpaired t-test was used for analysis in **b, f** and **h**. Two-way ANOVA followed by Bonferroni multiple-comparison analysis was used for **d, g** and **k**. Brown-Forsythe and Welch ANOVA tests was used for **e** and **i**.

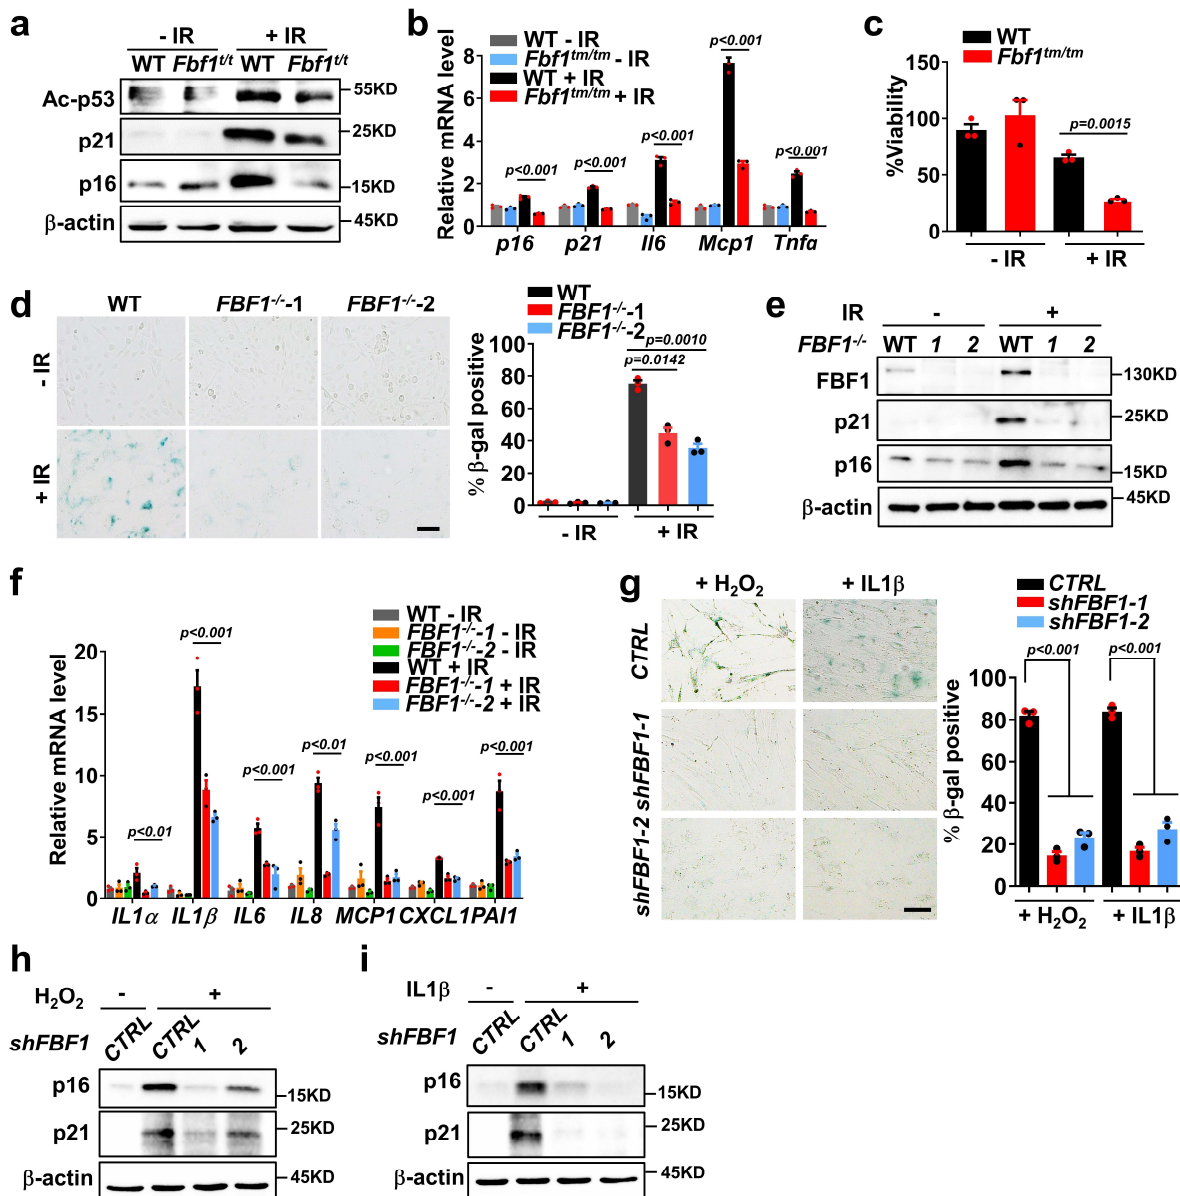

**Supplementary Fig. 3. FBF1 deficiency suppresses senescence induction.** **a-c**, Western blot of senescence markers (**a**), relative mRNA levels of SASP genes (**b**), and viability assay (**c**) in WT or *Fbf1<sup>tm1a/tm1a</sup>* MEF cells without or with IR exposure at day 7 post-irradiation. **d-f**, SA-β-gal staining (n>100 cells per experiment) (**d**), western blot of senescence markers (**e**) and relative mRNA levels of SASP genes (**f**) in WT or *FBF1<sup>-/-</sup>* RCTE cells at day 7 after irradiation. Scale bar, 200 μm. **g**, SA-β-gal staining in control or *shFBF1* IMR-90 cells at day 5 post H<sub>2</sub>O<sub>2</sub> or IL1β

treatment (n>100 cells per experiment). **h-i**, western blot of senescence markers in control or sh*FBFI* IMR-90 cells at day 5 post H<sub>2</sub>O<sub>2</sub> (**h**) or IL1 $\beta$  treatment (**i**). Three experiments were repeated independently with similar results. Results (**b-d**, **f-g**) from n=3 independent experiments were statistically analyzed and plotted as means  $\pm$  SEM. Two-way ANOVA followed by Bonferroni multiple-comparison analysis was used for **b** and **f**. Two-tailed Student's unpaired t-test was used for analysis in **c**. Brown-Forsythe and Welch ANOVA tests was used for **d** and **g**.

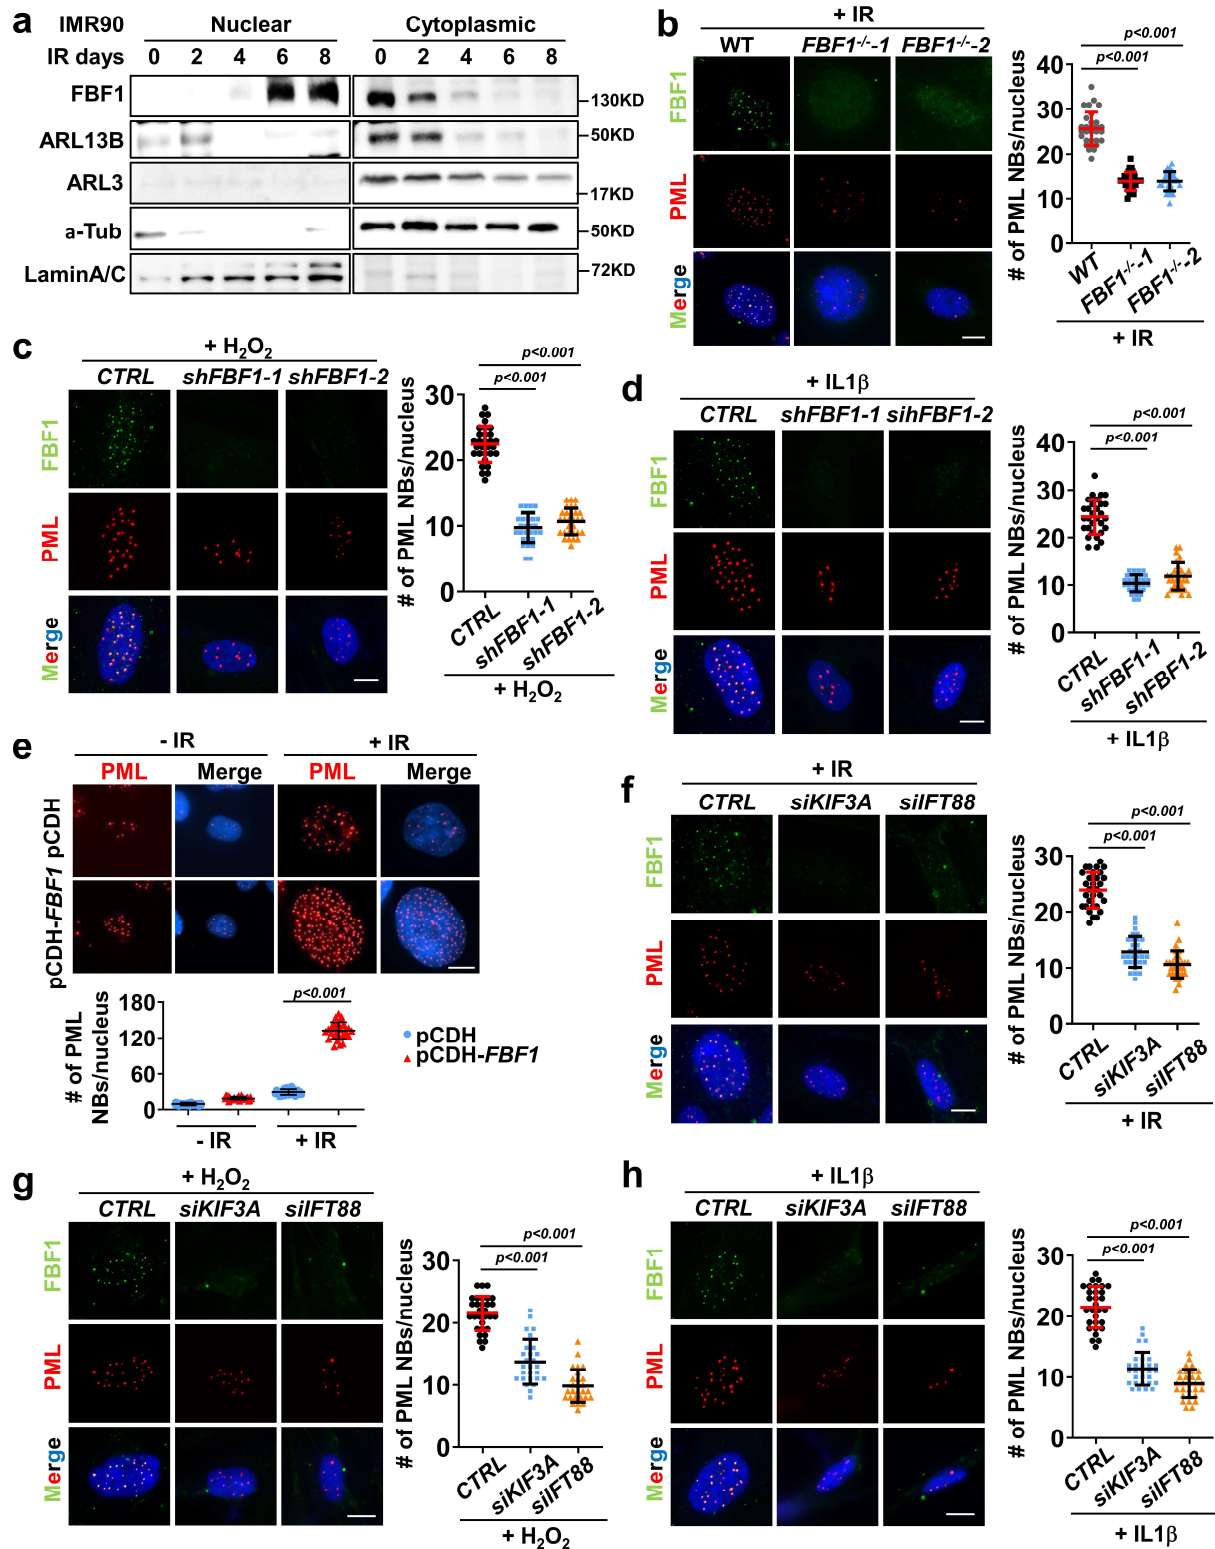

Supplementary Fig. 4. Primary cilia are required for IR-induced PML-NB translocation of FBF1 and PML-NB biogenesis. **a**, Western blot of ARL3, ARL13B and FBF1 in



nuclear and cytoplasmic fractions separated from IMR-90 cells after irradiation at indicated times. Three experiments were repeated independently with similar results. **b**, Immunofluorescent images for FBF1 and PML in WT or *FBF1*<sup>-/-</sup> RCTE cells at day 7 post-irradiation. n=30 cells. Scale bar, 10  $\mu$ m. **c-d**, localization of FBF1 and PML in H<sub>2</sub>O<sub>2</sub> (**c**) or IL1 $\beta$  (**d**) treated control or *FBF1*-knockdown IMR-90 cells. n=30 cells. Scale bar, 10  $\mu$ m. **e**, PML staining in RCTE cells overexpressed with plasmid pCDH vector or pCDH-FBF1-Myc at day 7 after irradiation. n=30 cells. Scale bar, 10  $\mu$ m. **f**, Immunofluorescent images for FBF1 and PML in *KIF3A* or *IFT88*-knockdown IMR-90 cells at day 10 after irradiation. n=30 cells. Scale bar, 10  $\mu$ m. **g-h**, localization of FBF1 and PML in *KIF3A* or *IFT88*-knockdown IMR-90 cells at day 5 post H<sub>2</sub>O<sub>2</sub> (**g**) or IL1 $\beta$  (**h**) treatment. n=30 cells. Scale bar, 10  $\mu$ m. Results (**b-h**) from n=3 independent experiments were statistically analyzed and plotted as means  $\pm$  SEM. One-way ANOVA followed by Bonferroni multiple-comparison analysis was employed for **b-h**.

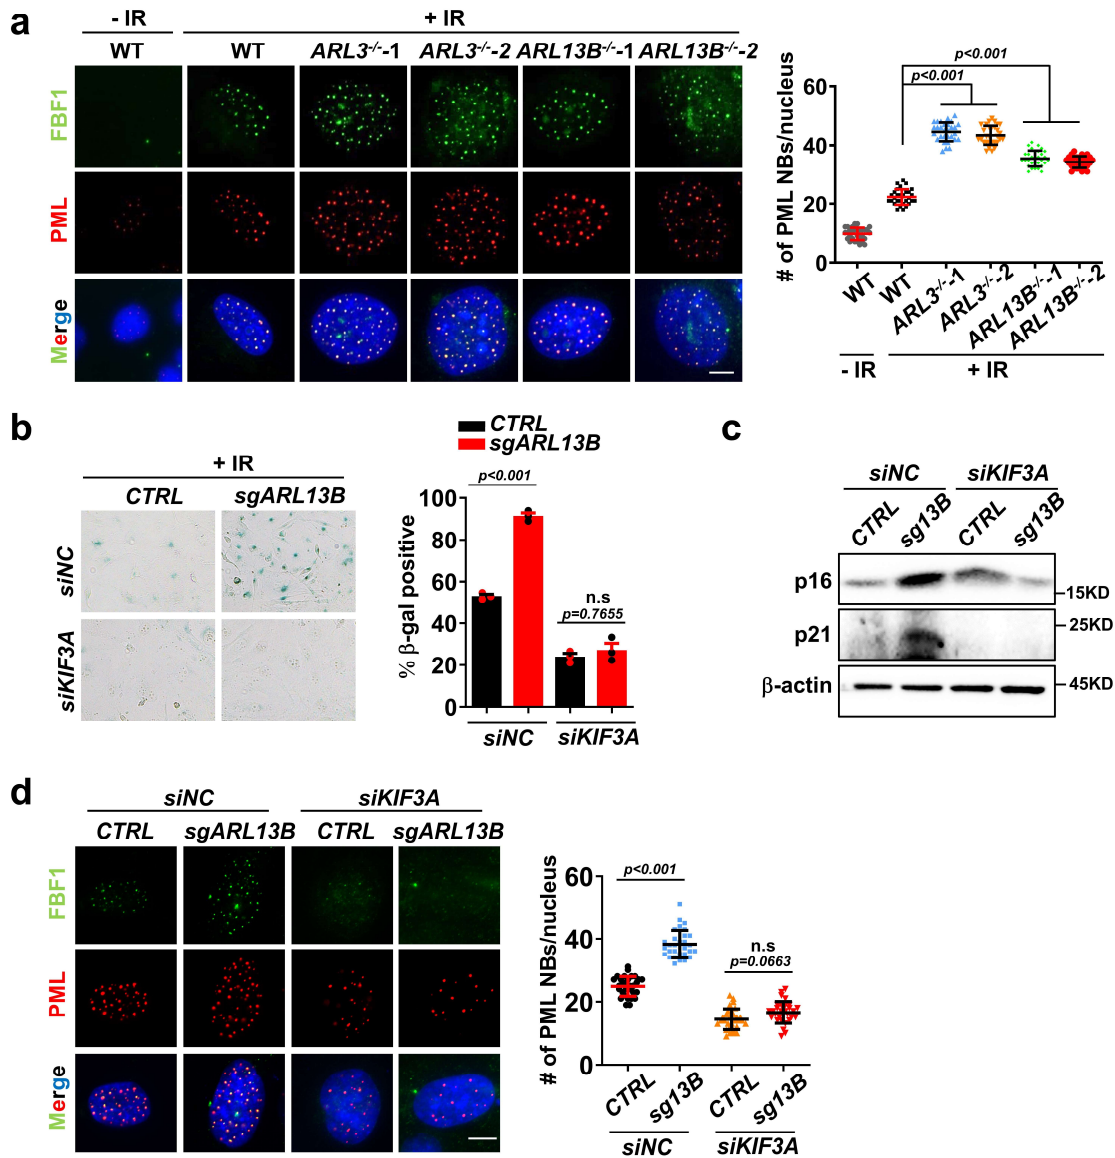

**Supplementary Fig. 5. Cilia suppression abrogates *ARL13B*-deficiency-induced senescence responses.** **a**, Immunofluorescent images for FBF1 and PML in WT or *ARL3*<sup>-/-</sup> or *ARL13B*<sup>-/-</sup> RCTE cells at day 7 after irradiation. n=30 cells. Scale bar, 10  $\mu$ m. **b-d**, SA- $\beta$ -gal staining (n>100 cells per experiment) (**b**), western blot of senescence markers (**c**) and localization of FBF1 and PML (**d**) in *siKIF3A*-treated WT or *ARL13B*<sup>-/-</sup> RCTE cells at day 7 post-irradiation. n=30 cells. Scale bar, 10  $\mu$ m. Results (**a-b**, **d**) from n=3 independent experiments were statistically analyzed and plotted as means  $\pm$  SEM. One-way ANOVA followed by Bonferroni multiple-comparison analysis was employed for **a** and **d**. Brown-Forsythe and Welch ANOVA tests was used for **b**.

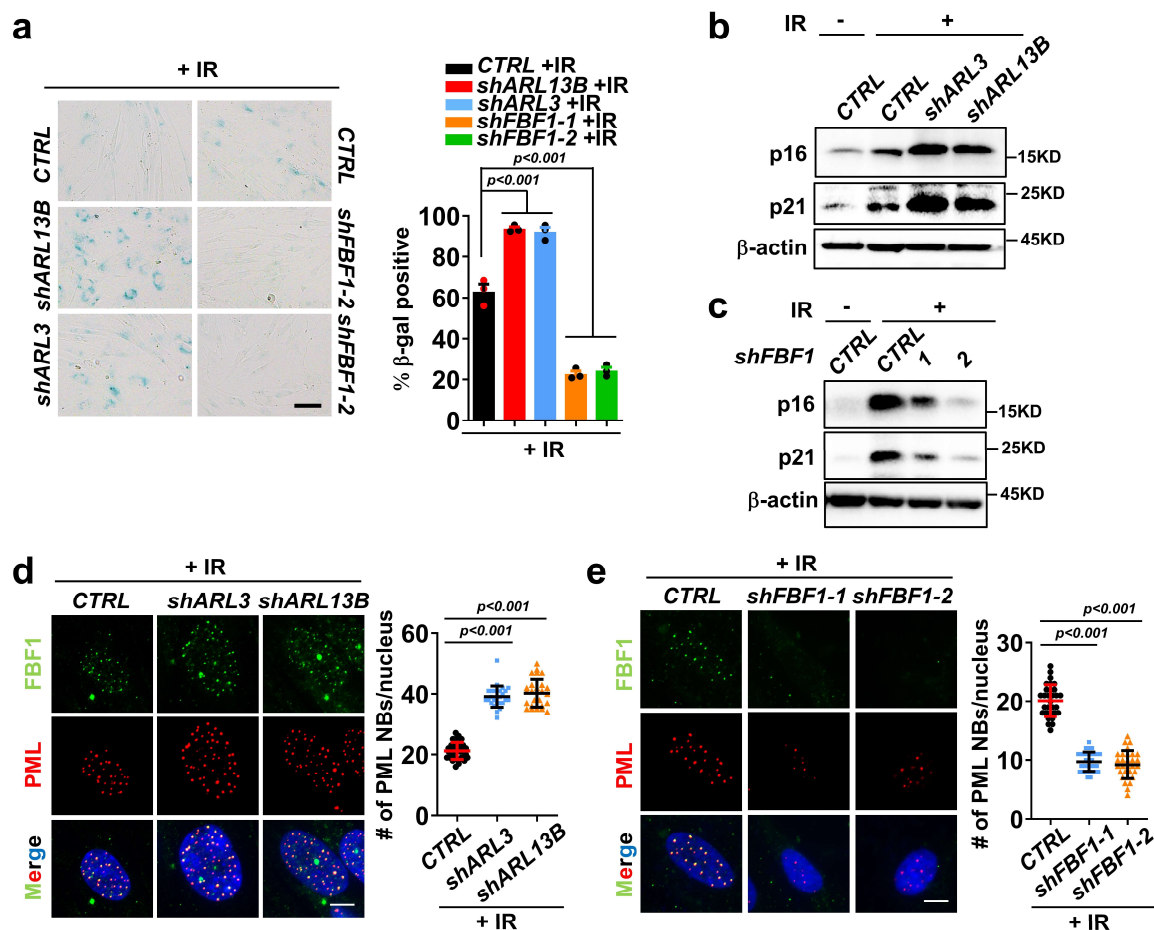

**Supplementary Fig. 6. ARL13B, ARL3 or FBF1 are key players in IR-induced senescence in BJ cells.** **a**, SA-β-gal staining in BJ cells stably expressing *shARL13B* or *shARL3* or *shFBF1* at day 10 after irradiation ( $n > 100$  cells per experiment). **b-c**, western blot of senescence markers in *ARL3* or *ARL13B*-knockdown (**b**) or *FBF1*-knockdown (**c**) BJ cells at day 10 post-irradiation. Three experiments were repeated independently with similar results. **d-e**, localization of FBF1 and PML in *ARL3* or *ARL13B*-knockdown (**d**) or *FBF1*-knockdown (**e**) BJ cells at day 10 post-irradiation.  $n = 30$  cells. Scale bar, 10  $\mu\text{m}$ . Results (**a**, **d-e**) from  $n = 3$  independent experiments were statistically analyzed and plotted as means  $\pm$  SEM. One-way ANOVA followed by Bonferroni multiple-comparison analysis was employed for **a**, **d** and **e**.

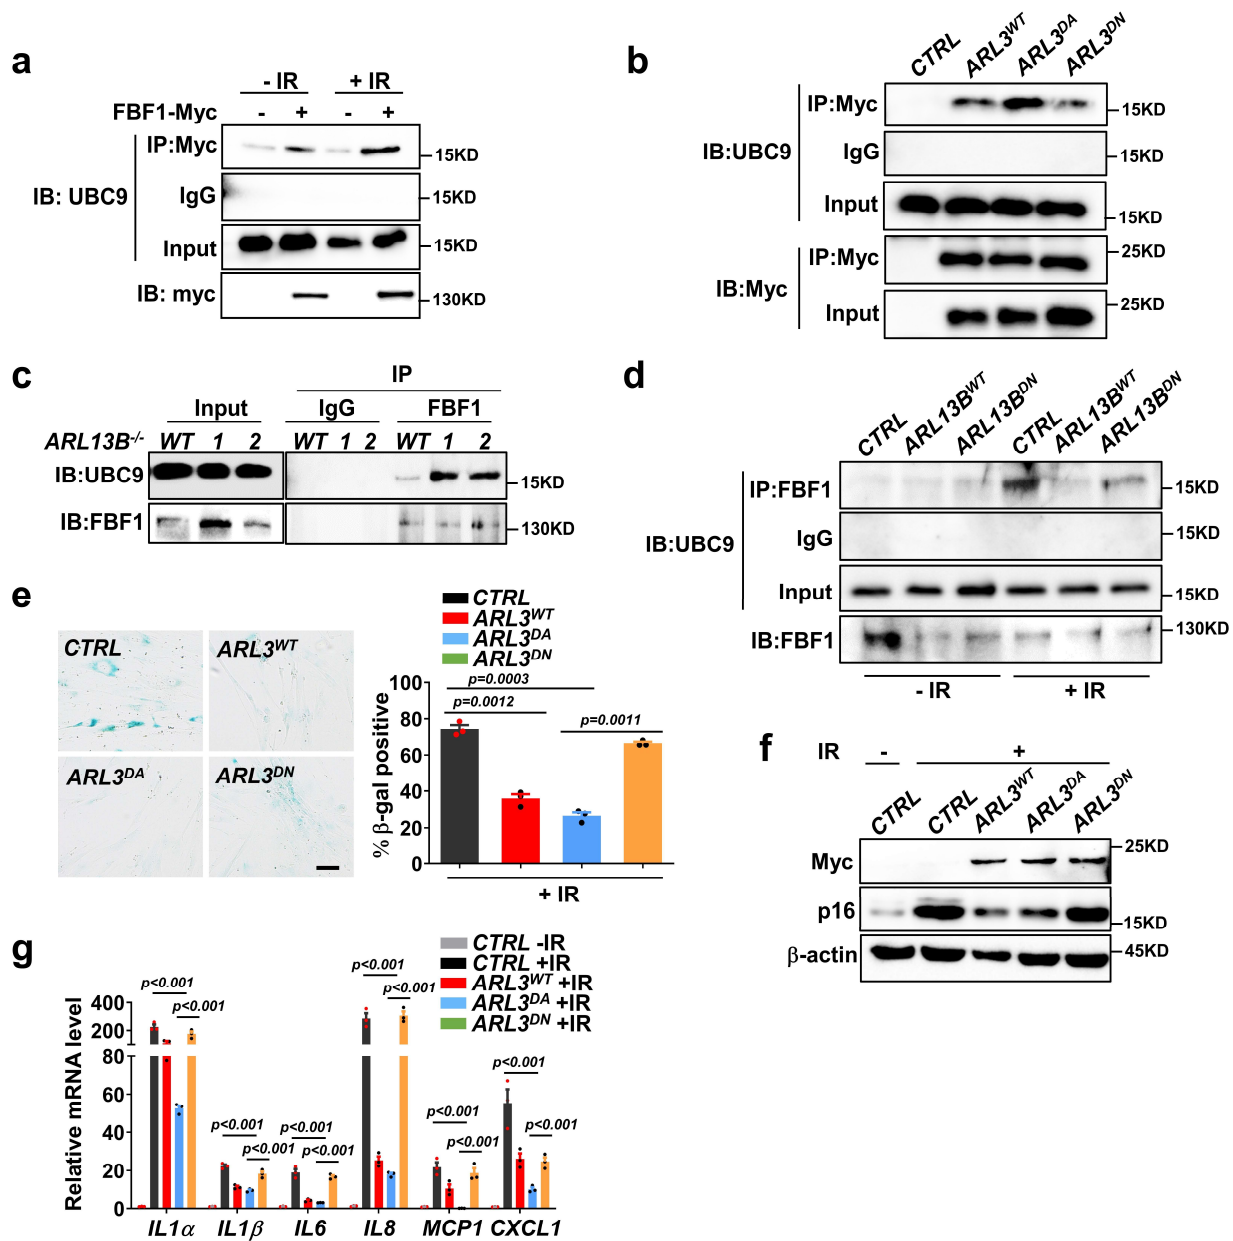

**Supplementary Fig. 7. The ARL13B-ARL3 GTPase cascade suppresses FBF1 SUMOylation and cellular senescence.** **a**, Myc-tagged FBF1 immunoprecipitates with endogenous UBC9 in RCTE cells overexpressing FBF1 without or with IR at day 7 post treatment. **b**, Anti-Myc antibody immunoprecipitates with endogenous UBC9 in RCTE cells overexpressing Myc-tagged ARL3<sup>WT</sup>, ARL3<sup>DA</sup> or ARL3<sup>DN</sup> at day 7 after IR treatment. **c**, Endogenous FBF1 immunoprecipitates with UBC9 in WT or *ARL13B*<sup>-/-</sup> RCTE cells at day 7 post-irradiation. **d**, Endogenous FBF1 immunoprecipitates with UBC9 in RCTE cells overexpressing ARL13B<sup>WT</sup> or ARL13B<sup>DN</sup> at day 7

post-irradiation. **e-g**, SA- $\beta$ -gal staining (n>100 cells per experiment) (**e**), western blot of senescence markers (**f**), and relative mRNA levels of SASP genes (**g**) in IMR-90 cells overexpressing ARL3<sup>WT</sup>, ARL3<sup>DA</sup> or ARL3<sup>DN</sup> at day 10 post-irradiation. Scale bar, 200  $\mu$ m. Three experiments were repeated independently with similar results (**a-d**). Results (**e, g**) from n=3 independent experiments were statistically analyzed and plotted as means  $\pm$  SEM. Brown-Forsythe and Welch ANOVA tests was used for **e**. Two-way ANOVA followed by Bonferroni multiple-comparison analysis was used for **g**.

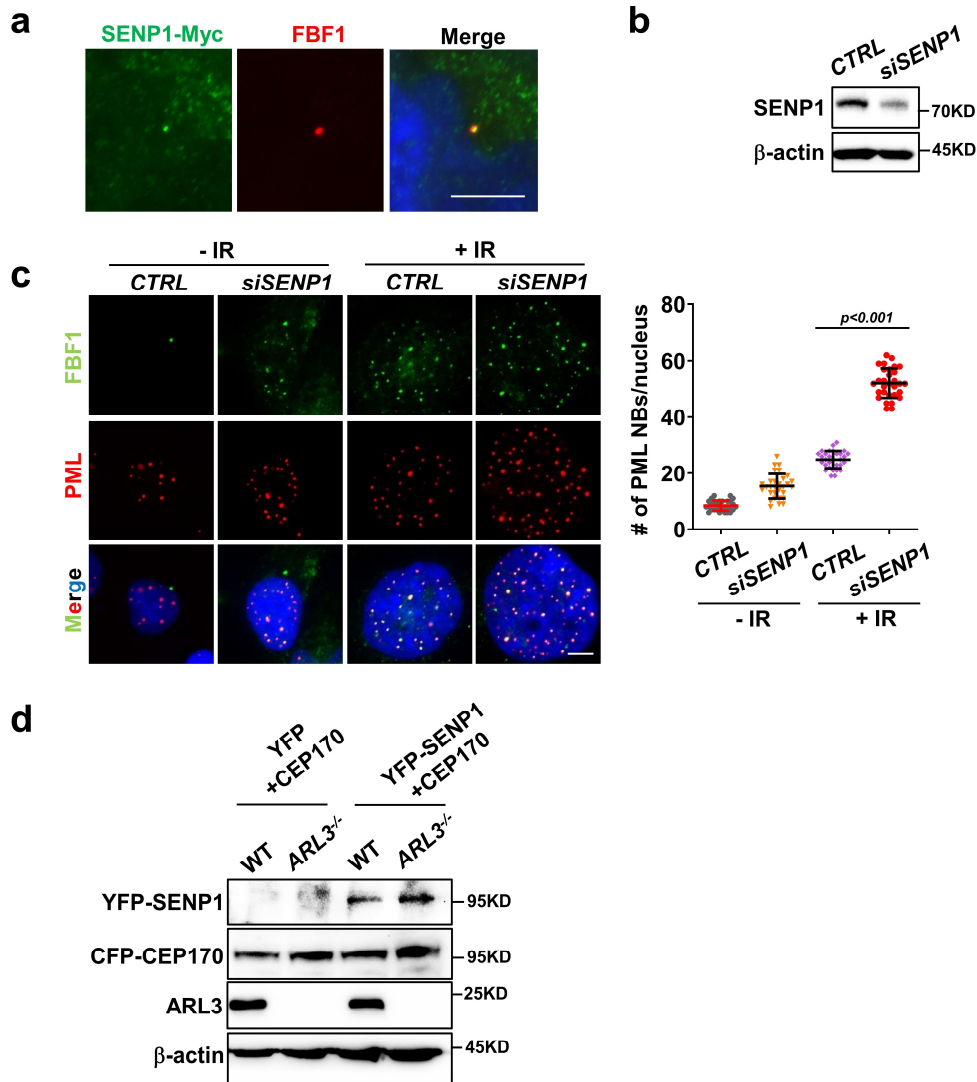

**Supplementary Fig. 8. SENP1 directly regulates FBF1 SUMOylation and its PML-NB translocation.** **a**, Immunofluorescent images for Myc-tagged SENP1 and FBF1 staining in RCTE cells. Scale bar, 10  $\mu$ m. Three experiments were repeated independently with similar results. **b**, Western blot of SENP1 in control or *SENPI*-knockdown RCTE cells. Three experiments were repeated independently with similar results. **c**, Immunofluorescent images for FBF1 and PML staining in control or *SENPI*-knockdown RCTE cells without or with IR at day 7 post-irradiation. n=30 cells. Scale bar, 10  $\mu$ m. **d**, Western blot of WT or *ARL3*<sup>-/-</sup> RCTE cells co-transfected with CEP170c-CFP-FRB and YFP-FKBP-SENPI. Three experiments were repeated independently with similar results. Results (**c**) from n=3 independent experiments were statistically analyzed and

plotted as means  $\pm$  SEM. One-way ANOVA followed by Bonferroni multiple-comparison analysis was employed for **c**.

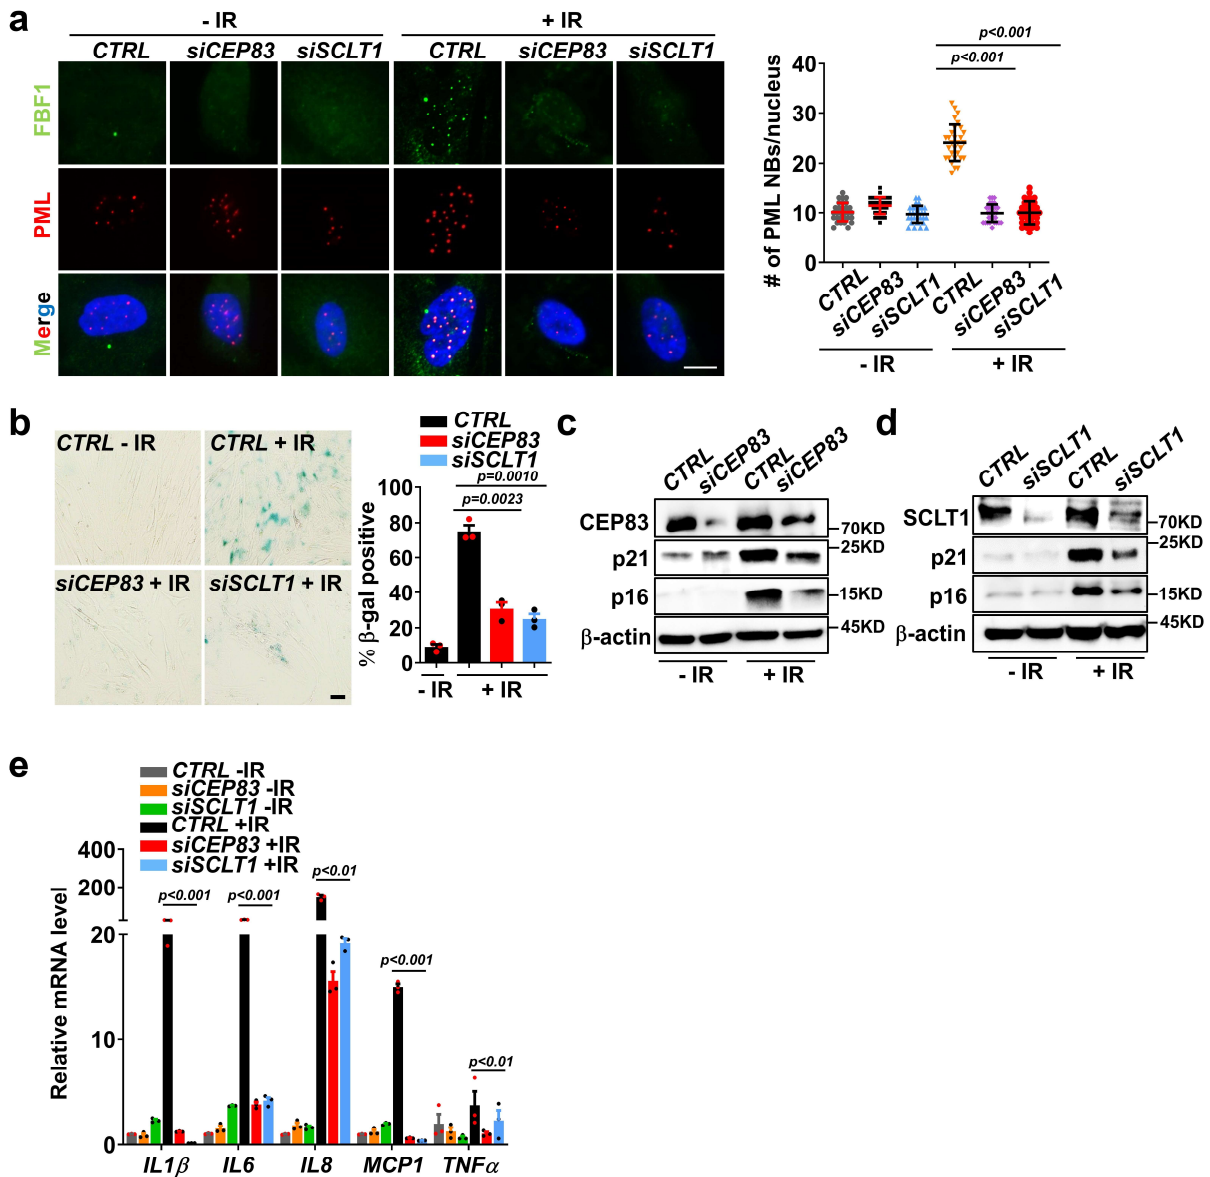

**Supplementary Fig. 9. TF localization of FBF1 is a prerequisite for IR-induced PML-NB translocation and senescence initiation in IMR-90 cells.** **a**, Immunofluorescent images for FBF1 and PML staining in control, *CEP83*-knockdown, or *SCLT1*-knockdown IMR-90 cells without or with IR at day 7 post-irradiation.  $n=30$  cells. Scale bar, 10  $\mu\text{m}$ . **b-e**, SA- $\beta$ -gal staining ( $n>100$  cells per experiment) (**b**), western blot of senescence markers (**c**, **d**) and relative mRNA levels of SASP genes (**e**) in control, *CEP83*-knockdown, or *SCLT1*-konckdown IMR-90 cells at day 7 post-irradiation. Scale bar, 20  $\mu\text{m}$ . Results (**a-b**, **e**) from  $n=3$  independent experiments were statistically



analyzed and plotted as means  $\pm$  SEM. One-way ANOVA followed by Bonferroni multiple-comparison analysis was employed for **a**. Brown-Forsythe and Welch ANOVA tests was used for **b**. Two-way ANOVA followed by Bonferroni multiple-comparison analysis was used for **e**.

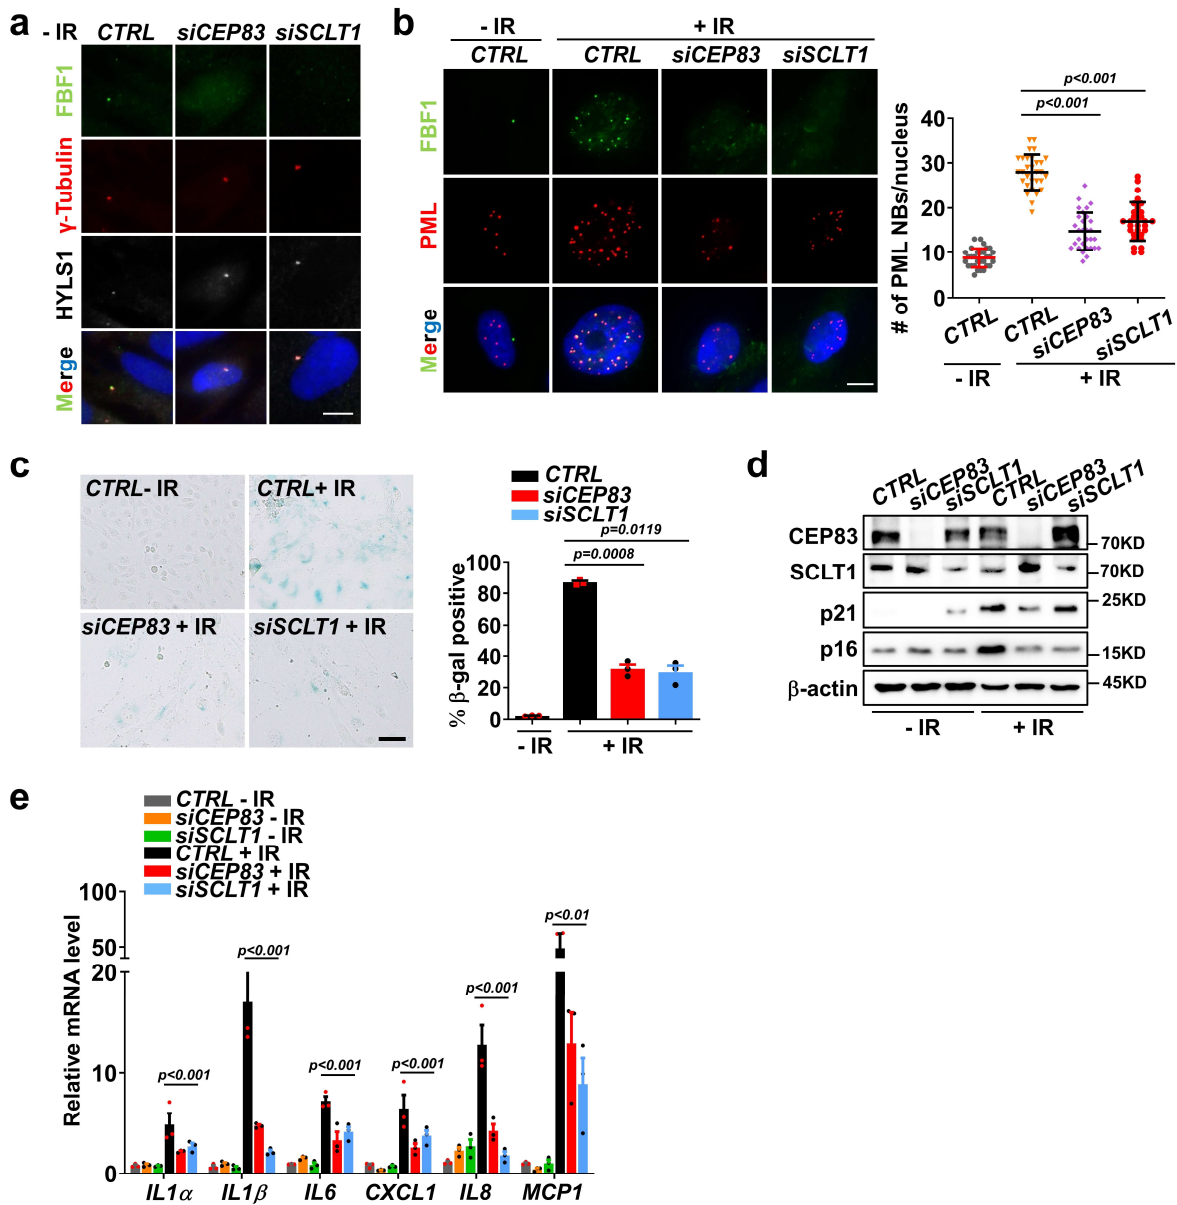

**Supplementary Fig. 10. TF localization of FBF1 is a prerequisite for its role in senescence initiation in RCTE cells. a, b,** Immunofluorescent images for FBF1,  $\gamma$ -tubulin and HYLS1 (a) or PML (b) in control or *CEP83*-knockdown or *SCLT1*-knockdown RCTE cells without or with IR at day 7 post-irradiation. n=30 cells. Scale bar, 10  $\mu$ m. **c-e,** SA- $\beta$ -gal staining (n>100 cells per experiment) (c), western blot of senescence markers (d) and relative mRNA levels of SASP markers (e) in control, *CEP83*-knockdown, or *SCLT1*-knockdown RCTE cells at day 7 post-irradiation. Scale bar, 200  $\mu$ m. Results (b, c, e) from n=3 independent experiments were

statistically analyzed and plotted as means  $\pm$  SEM. One-way ANOVA followed by Bonferroni multiple-comparison analysis was employed for **b**. Brown-Forsythe and Welch ANOVA tests was used for **c**. Two-way ANOVA followed by Bonferroni multiple-comparison analysis was used for **e**.

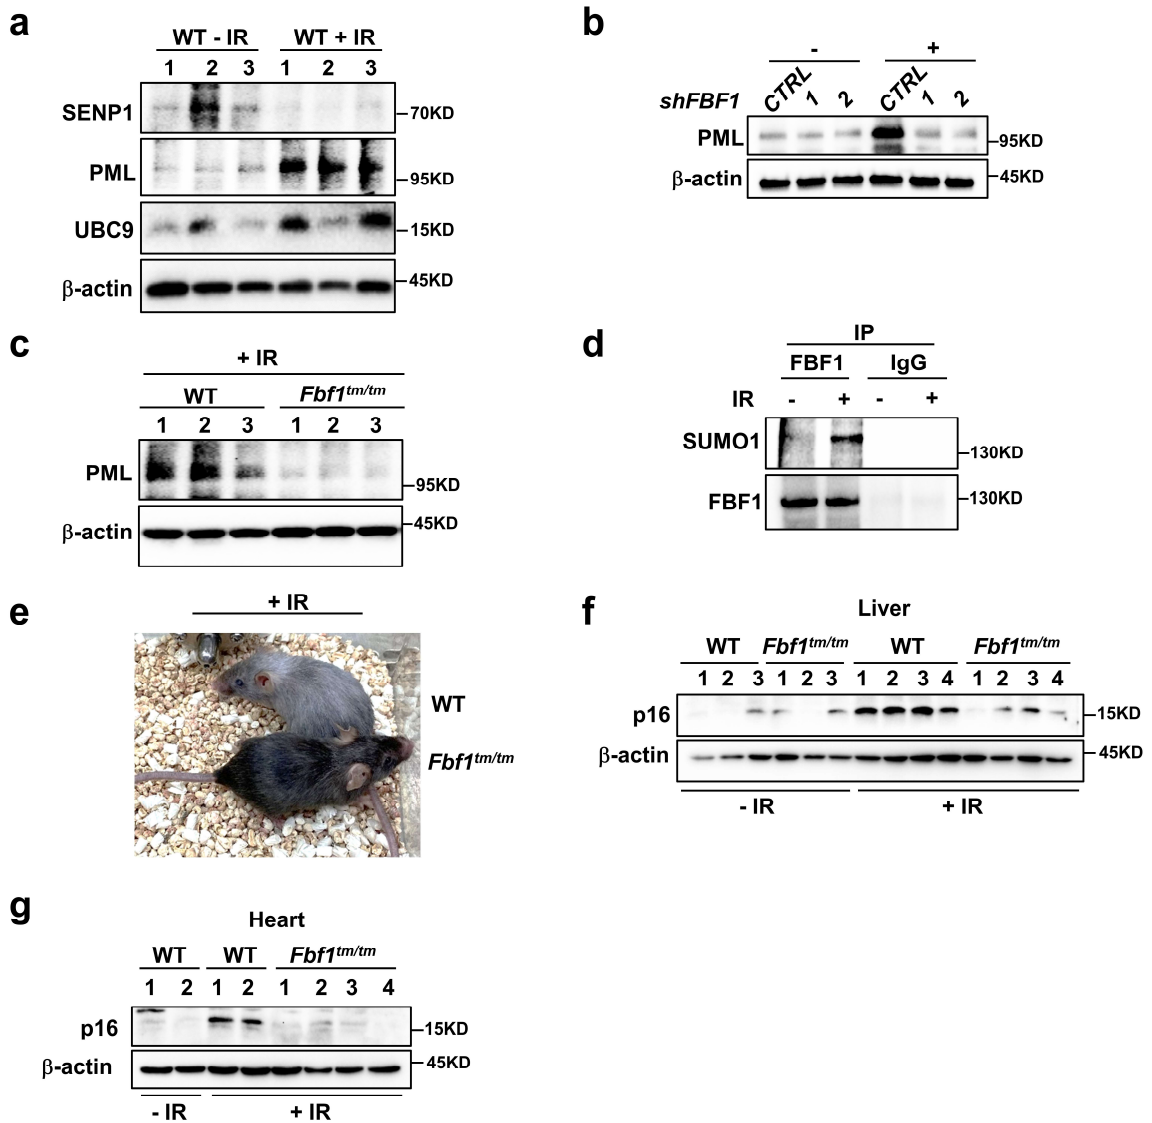

**Supplementary Fig. 11. FBF1 ablation protects mice from IR-induced senescence and associated frailty.** **a**, Lysates obtained from lung tissue of WT mice two weeks post IR were subjected to western blot analysis against indicated proteins. **b**, Western blot of PML in control or shFBF1 IMR-90 cells at day 10 post-irradiation. **c**, protein level of PML in lung tissue of WT mice or *Fbf1<sup>tm1a/tm1a</sup>* mice two weeks post IR. **d**, Endogenous FBF1 immunoprecipitates with SUMO1 in lung tissue of WT mice with or without irradiation. **e**, Representative images of mice one year post IR. **f-g**, Lysates obtained from liver (**f**) and heart (**g**) tissue of WT or *Fbf1<sup>tm1a/tm1a</sup>* mice two

weeks post IR were subjected to western blot analysis against indicated proteins. Three experiments were repeated independently with similar results (**a-d, f-g**).
