# Supplementary material for: A stress-induced cilium-to-PML-NB route drives senescence initiation
Source: PubMed Central journal article supplement (PMC10076330; doi:10.1038/s41467-023-37362-7), 2023-04-03
Supplement: 41467_2023_37362_MOESM3_ESM.pdf [file 41467_2023_37362_MOESM3_ESM.pdf]

File name: Supplementary Data 1

Description: Sequences of oligonucleotides.
